# Supplementary material for: The correlation between osteoporotic vertebrae fracture risk and bone mineral density measured by quantitative computed tomography and dual energy X-ray absorptiometry: a systematic review and meta-analysis
Source: Springer Nature journal article supplement (doi:10.1007/s00586-023-07917-9), 2023-09-23
Supplement: MOESM1 [file 26080142]

### Supplementary File Retrieval of Pubmed

((sensitivity[Title/Abstract] OR sensitivity and specificity[MeSH] OR (predictive[Title/Abstract] AND value\*[Title/Abstract]) OR predictive value of tests[MeSH] OR accuracy\*[Title/Abstract]) AND ("QCT"[Title/Abstract] OR "quantitative computed tomography"[Title/Abstract] OR "bone qct"[Title/Abstract] OR "quantitative computed tomography"[Title/Abstract] OR "quantitative-CT"[Title/Abstract] OR "Q-CT"[Title/Abstract] OR "quantitative tomographic"[Title/Abstract] OR "quantitative-CT"[Title/Abstract] OR "bone quantitative computed tomography"[Title/Abstract] OR "qct analysis"[Title/Abstract])) AND (((((((((((((((((((((((("Absorptiometry, Photon"[Mesh] OR (Densitometry, X-Ray[Title/Abstract])) OR (Densitometry, X Ray[Title/Abstract])) OR (X-Ray Densitometry[Title/Abstract])) OR (Densitometry, Xray[Title/Abstract])) OR (Xray Densitometry[Title/Abstract])) OR (Dual-Energy X-Ray Absorptiometry Scan[Title/Abstract])) OR (Dual Energy X Ray Absorptiometry Scan[Title/Abstract])) OR (DXA Scan[Title/Abstract])) OR (DXA Scans[Title/Abstract])) OR (Scan, DXA[Title/Abstract])) OR (Scans, DXA[Title/Abstract])) OR (DEXA Scan[Title/Abstract])) OR (DEXA Scans[Title/Abstract])) OR (Scan, DEXA[Title/Abstract])) OR (Scans, DEXA[Title/Abstract])) ) OR (Dual-Energy X-Ray Absorptiometry[Title/Abstract])) OR (Dual Energy X Ray Absorptiometry[Title/Abstract])) OR (X-Ray Absorptiometry, Dual-Energy[Title/Abstract])) OR (X Ray Absorptiometry, Dual Energy[Title/Abstract])) OR (DPX Absorptiometry[Title/Abstract])) OR (Absorptiometries, DPX[Title/Abstract])) OR (Absorptiometry, DPX[Title/Abstract])) OR (Absorptiometry, Dual X-Ray[Title/Abstract])) OR (Absorptiometry, Dual X Ray[Title/Abstract])) OR (X-Ray Absorptiometry, Dual[Title/Abstract])) OR (Absorptiometry, Dual-Energy X-Ray[Title/Abstract])) OR (Absorptiometry, Dual Energy X Ray[Title/Abstract])) OR (Dual X-Ray Absorptiometry[Title/Abstract])) OR (Dual X Ray Absorptiometry[Title/Abstract])) AND (((((((((((((((((((((((Osteoporosis, Senile[Title/Abstract] OR (Osteoporoses, Senile[Title/Abstract])) OR (Senile Osteoporoses[Title/Abstract])) OR (Osteoporosis, Involutional[Title/Abstract])) OR (Senile Osteoporosis[Title/Abstract])) OR (Osteoporosis, Age-Related[Title/Abstract])) OR (Osteoporosis, Age Related[Title/Abstract])) OR (Bone Loss, Age-Related[Title/Abstract])) OR (Age-Related Bone Loss[Title/Abstract])) OR (Age-Related Bone Losses[Title/Abstract])) OR (Bone Loss, Age Related[Title/Abstract])) OR (Bone Losses, Age-Related[Title/Abstract])) OR (Age-Related Osteoporosis[Title/Abstract])) OR (Age Related Osteoporosis[Title/Abstract])) OR (Age-Related Osteoporoses[Title/Abstract])) OR (Osteoporoses, Age-Related[Title/Abstract])) OR ("Osteoporosis"[Mesh]))
